# Supplementary material
Source: PubMed Central journal article supplement (PMC3746216)
Supplement: Supp_Fig2.pdf [file Supp_Fig2.pdf]

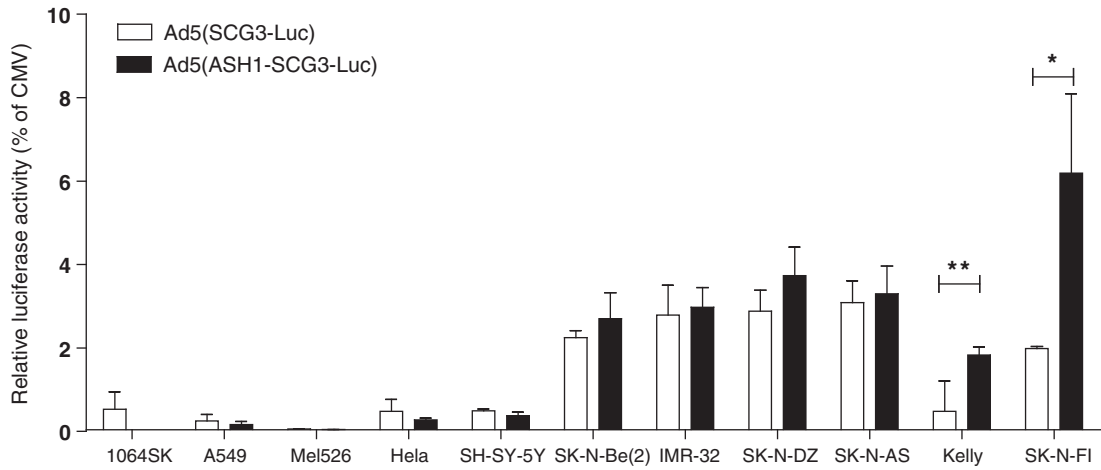

**SUPPLEMENTARY FIG. S2.** Selective activity of SCG3 promoter-based viruses in neuroblastoma cell lines. Adenoviral vectors with luciferase gene expression controlled by either the 0.5-kb SCG3 promoter [Ad5(SCG3-Luc)] alone or together with the 0.2-kb ASH1 enhancer [Ad5(ASH1-SCG3-Luc)] were constructed. Neuroblastoma cell lines [SH-SY-5Y, SK-N-Be(2), IMR-32, SK-N-DZ, SK-N-AS, Kelly, and SK-N-FI], nonneuroblastoma tumor cell lines (A549, Mel526, HeLa), and normal fibroblast cells (1064Sk) were transduced with Ad5(SCG3-Luc) and Ad5(ASH1-SCG3-Luc) at 100 EVG/cell. Relative luciferase activity was analyzed 48 hr after transduction. Values are normalized to the luciferase activity of Ad5(CMV-Luc), set to 100% for each cell line (\* $p < 0.05$ , \*\*\* $p < 0.001$ ).
